# Supplementary material for: Understanding the resilient carbon cycle response to the 2014–2015 Blob event in the Gulf of Alaska using a regional ocean biogeochemical model
Source: Copernicus journal article supplement (doi:10.5194/egusphere-2026-657), 2026-02-06
Supplement: Supplementary file 1 [file egusphere-2026-657-supplement.pdf]

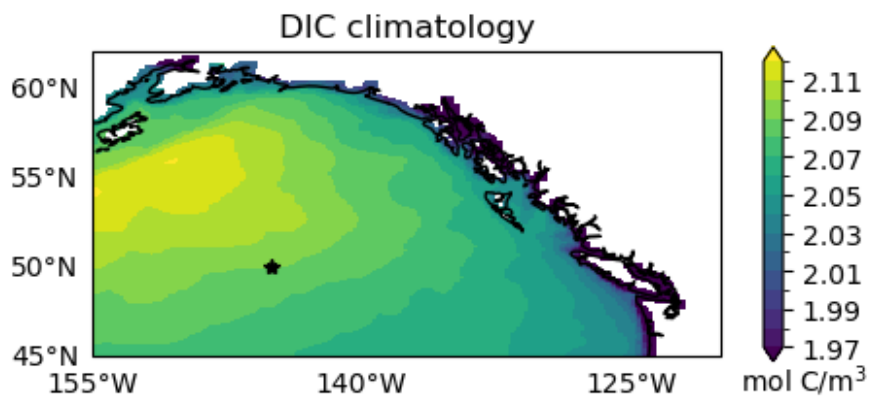

**Figure S1: Climatology of DIC from the model. The star indicates the location of OSP.**

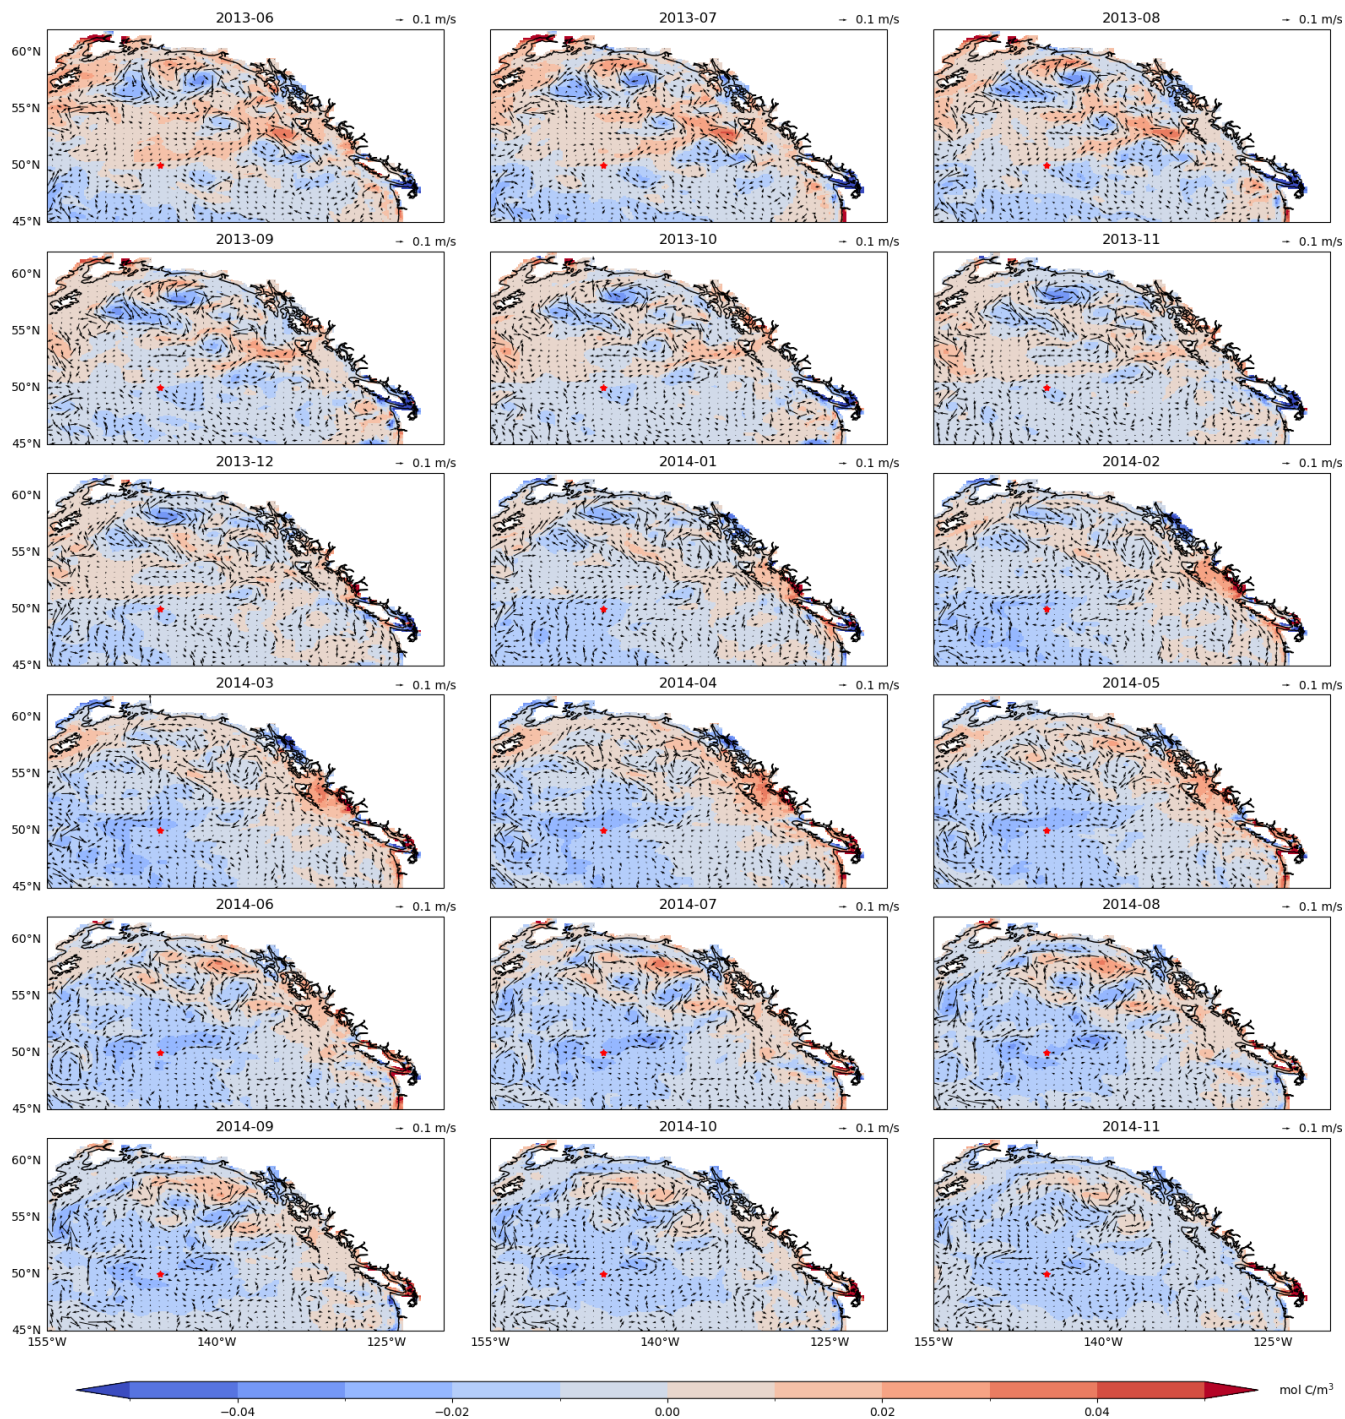

**Figure S2: Surface velocity (vectors) and DIC (colored shading) anomalies relative to 2010–2017, from June 2013 to November 2014. All variables have been detrended and deseasonalized. Velocities are smoothed using a 3-month moving average.**
